# Supplementary material
Source: PubMed Central journal article supplement (PMC4996034)
Supplement: mnp-0001-0201-s01.pdf [file mnp-0001-0201-s01.pdf]

## Erratum

---

In the article by Hjelm BE, Rollins B, Mamdani F et al., entitled 'Evidence of mitochondrial dysfunction within the complex genetic etiology of schizophrenia' [Mol Neuropsychiatry 2015;1:201–219, DOI: 10.1159/000441252], the authors would like to add two additional co-authors (marked in bold).

Brooke E. Hjelm<sup>a</sup> Brandi Rollins<sup>a</sup> Firoza Mamdani<sup>a</sup> Julie C. Lauterborn<sup>b</sup>  
**Foram N. Ashar<sup>e</sup> Dan E. Arking<sup>e</sup> George Kirov<sup>d</sup> Gary Lynch<sup>a, b</sup>**  
Christine M. Gall<sup>b, c</sup> Adolfo Sequeira<sup>a</sup> Marquis P. Vawter<sup>a</sup>

Departments of <sup>a</sup>Psychiatry & Human Behavior, <sup>b</sup>Anatomy & Neurobiology, and <sup>c</sup>Neurobiology & Behavior, University of California, Irvine, Calif., USA; <sup>d</sup>MRC Centre for Neuropsychiatric Genetics and Genomics, Institute of Psychological Medicine and Clinical Neurosciences, Cardiff University, Cardiff, UK; <sup>e</sup>McKusick-Nathans Institute of Genetic Medicine, Johns Hopkins University School of Medicine, Baltimore, Md., USA
