# Supplementary material
Source: PubMed Central journal article supplement (PMC4996034)
Supplement: mnp-0001-0201-s03.pdf [file mnp-0001-0201-s03.pdf]

| Gene Symbol    | Description                                                                              | SZ Association Type      | Reference |
|----------------|------------------------------------------------------------------------------------------|--------------------------|-----------|
| <i>ABCB10</i>  | ATP-binding cassette, sub-family B (MDR/TAP), member 10                                  | DER (teen > adult)       | [36]      |
| <i>ABCB10</i>  | ATP-binding cassette, sub-family B (MDR/TAP), member 10                                  | DER (teen > child)       | [36]      |
| <i>ABHD10</i>  | abhydrolase domain containing 10                                                         | DER (teen > adult)       | [36]      |
| <i>ACAD8</i>   | acyl-Coenzyme A dehydrogenase family, member 8                                           | CNV                      | [18]      |
| <i>ACADSB</i>  | acyl-Coenzyme A dehydrogenase, short/branched chain                                      | Peak Expression (15-25y) | [35]      |
| <i>ACAT1</i>   | acetyl-Coenzyme A acetyltransferase 1 (acetoacetyl Coenzyme A thiolase)                  | RNA (DG)                 | [34]      |
| <i>ACAT2</i>   | acetyl-Coenzyme A acetyltransferase 2 (acetoacetyl Coenzyme A thiolase)                  | Protein (ACC)            | [37]      |
| <i>ACN9</i>    | ACN9 homolog ( <i>S. cerevisiae</i> )                                                    | <i>de novo</i> mutation  | [14]      |
| <i>ACO1</i>    | aconitase 1, soluble                                                                     | <i>de novo</i> mutation  | [14]      |
| <i>ACO2</i>    | aconitase 2, mitochondrial                                                               | Rare mutation            | [15]      |
| <i>ACO2</i>    | aconitase 2, mitochondrial                                                               | Protein (DLPFC)          | [37]      |
| <i>ACP6</i>    | acid phosphatase 6, lysophosphatidic                                                     | CNV                      | [18]      |
| <i>ACSL1</i>   | acyl-CoA synthetase long-chain family member 1                                           | Peak Expression (15-25y) | [35]      |
| <i>ACSL4</i>   | acyl-CoA synthetase long-chain family member 4                                           | <i>de novo</i> mutation  | [14]      |
| <i>ACSL5</i>   | acyl-CoA synthetase long-chain family member 5                                           | <i>de novo</i> mutation  | [14]      |
| <i>ACYP2</i>   | acylphosphatase 2, muscle type                                                           | Peak Expression (15-25y) | [35]      |
| <i>AGXT2</i>   | alanine-glyoxylate aminotransferase 2-like 2                                             | CNV                      | [18]      |
| <i>AIFM2</i>   | apoptosis-inducing factor, mitochondrion-associated, 2                                   | DER (teen > adult)       | [36]      |
| <i>AIFM2</i>   | apoptosis-inducing factor, mitochondrion-associated, 2                                   | DER (teen > child)       | [36]      |
| <i>AIFM3</i>   | apoptosis-inducing factor, mitochondrion-associated, 3                                   | CNV                      | [18]      |
| <i>ALAS1</i>   | aminolevulinate, delta-, synthase 1                                                      | <i>de novo</i> mutation  | [14]      |
| <i>ALDH1B1</i> | aldehyde dehydrogenase 1 family, member B1                                               | Peak Expression (15-25y) | [35]      |
| <i>ALDH1L1</i> | aldehyde dehydrogenase 1 family, member L1                                               | <i>de novo</i> mutation  | [14]      |
| <i>ALDH1L2</i> | aldehyde dehydrogenase 1 family, member L2                                               | <i>de novo</i> mutation  | [14]      |
| <i>ALDH5A1</i> | aldehyde dehydrogenase 5 family, member A1 (succinate-semialdehyde dehydrogenase)        | <i>de novo</i> mutation  | [14]      |
| <i>ALDH7A1</i> | aldehyde dehydrogenase 7 family, member A1                                               | Protein (ACC)            | [37]      |
| <i>AMACR</i>   | alpha-methylacyl-CoA racemase                                                            | CNV                      | [18]      |
| <i>ARMC1</i>   | armadillo repeat containing 1                                                            | Peak Expression (15-25y) | [35]      |
| <i>AS3MT</i>   | arsenic (+3 oxidation state) methyltransferase                                           | GWAS (PGC)               | [12]      |
| <i>ATAD3A</i>  | ATPase family, AAA domain containing 3A                                                  | Peak Expression (15-25y) | [35]      |
| <i>ATAD3B</i>  | ATPase family, AAA domain containing 3B                                                  | DER (teen > adult)       | [36]      |
| <i>ATP5A1</i>  | ATP synthase, H+ transporting, mitochondrial F1 complex, alpha subunit 1, cardiac muscle | Rare mutation            | [15]      |
| <i>ATP5A1</i>  | ATP synthase, H+ transporting, mitochondrial F1 complex, alpha subunit 1, cardiac muscle | RNA (PFC area 9)         | [13]      |
| <i>ATP5A1</i>  | ATP synthase, H+ transporting, mitochondrial F1 complex, alpha subunit 1, cardiac muscle | Protein (DLPFC/ACC)      | [37]      |
| <i>ATP5B</i>   | ATP synthase, H+ transporting, mitochondrial F1 complex, beta polypeptide                | RNA (DLPFC pyramidal)    | [5]       |
| <i>ATP5B</i>   | ATP synthase, H+ transporting, mitochondrial F1 complex, beta polypeptide                | Protein (DLPFC/CC)       | [37]      |
| <i>ATP5C1</i>  | ATP synthase, H+ transporting, mitochondrial F1 complex, gamma polypeptide 1             | RNA (DLPFC pyramidal)    | [5]       |

| Gene Symbol | Description                                                                                 | SZ Association Type      | Reference |
|-------------|---------------------------------------------------------------------------------------------|--------------------------|-----------|
| ATP5F1      | ATP synthase, H+ transporting, mitochondrial F0 complex, subunit B1                         | RNA (DLPFC pyramidal)    | [5]       |
| ATP5H       | ATP synthase, H+ transporting, mitochondrial F0 complex, subunit d                          | Protein (DLPFC)          | [37]      |
| ATP5J       | ATP synthase, H+ transporting, mitochondrial F0 complex, subunit F2                         | CNV                      | [18]      |
| ATP5J       | ATP synthase, H+ transporting, mitochondrial F0 complex, subunit F2                         | Peak Expression (15-25y) | [35]      |
| ATP5L       | ATP synthase, H+ transporting, mitochondrial F0 complex, subunit G                          | RNA (DLPFC pyramidal)    | [5]       |
| ATP5O       | ATP synthase, H+ transporting, mitochondrial F1 complex, O subunit (oligomycin sensitivity) | DER (teen > adult)       | [36]      |
| ATP5S       | ATP synthase, H+ transporting, mitochondrial F0 complex, subunit s (factor B)               | Peak Expression (15-25y) | [35]      |
| ATPAF1      | ATP synthase mitochondrial F1 complex assembly factor 1                                     | Peak Expression (15-25y) | [35]      |
| ATPAF2      | ATP synthase mitochondrial F1 complex assembly factor 2                                     | GWAS (PGC)               | [12]      |
| BCAT1       | branched chain aminotransferase 1, cytosolic                                                | de novo mutation         | [14]      |
| BDH1        | 3-hydroxybutyrate dehydrogenase, type 1                                                     | de novo CNV              | [19]      |
| BDH1        | 3-hydroxybutyrate dehydrogenase, type 1                                                     | CNV                      | [18]      |
| BDH1        | 3-hydroxybutyrate dehydrogenase, type 1                                                     | DER (teen > adult)       | [36]      |
| C12orf62    | chromosome 12 open reading frame 62                                                         | Peak Expression (15-25y) | [35]      |
| C1orf151    | chromosome 1 open reading frame 151                                                         | Peak Expression (15-25y) | [35]      |
| C1QBP       | complement component 1, q subcomponent binding protein                                      | DER (teen > adult)       | [36]      |
| C20orf142   | chromosome 20 open reading frame 142                                                        | Peak Expression (15-25y) | [35]      |
| C20orf44    | chromosome 20 open reading frame 44                                                         | Peak Expression (15-25y) | [35]      |
| C2orf47     | chromosome 2 open reading frame 47                                                          | GWAS (PGC)               | [12]      |
| C3orf1      | chromosome 3 open reading frame 1                                                           | Peak Expression (15-25y) | [35]      |
| C3orf28     | chromosome 3 open reading frame 28                                                          | Peak Expression (15-25y) | [35]      |
| C3orf60     | chromosome 3 open reading frame 60                                                          | Peak Expression (15-25y) | [35]      |
| CABC1       | chaperone, ABC1 activity of bc1 complex homolog (S. pombe)                                  | Peak Expression (15-25y) | [35]      |
| CBR4        | carbonyl reductase 4                                                                        | de novo mutation         | [14]      |
| CCDC109A    | coiled-coil domain containing 109A                                                          | Peak Expression (15-25y) | [35]      |
| CERK        | ceramide kinase                                                                             | de novo mutation         | [14]      |
| CERK        | ceramide kinase                                                                             | DER (teen > adult)       | [36]      |
| CHAT        | choline acetyltransferase                                                                   | Protein (ACC)            | [37]      |
| CHCHD7      | coiled-coil-helix-coiled-coil-helix domain containing 7                                     | Peak Expression (15-25y) | [35]      |
| CKMT1A      | creatine kinase, mitochondrial 1A                                                           | Protein (DLPFC/ACC)      | [37]      |
| CKMT1B      | creatine kinase, mitochondrial 1B                                                           | Protein (ACC)            | [37]      |
| CLPX        | ClpX caseinolytic peptidase X homolog (E. coli)                                             | de novo mutation         | [14]      |
| CLPX        | ClpX caseinolytic peptidase X homolog (E. coli)                                             | Peak Expression (15-25y) | [35]      |
| CLPX        | ClpX caseinolytic peptidase X homolog (E. coli)                                             | DER (teen > child)       | [36]      |
| COMT        | catechol-O-methyltransferase                                                                | CNV (22q11.2)            | [32]      |
| COMT        | catechol-O-methyltransferase                                                                | CNV                      | [18]      |
| COMTD1      | catechol-O-methyltransferase domain containing 1                                            | Peak Expression (15-25y) | [35]      |

| Gene Symbol | Description                                                                               | SZ Association Type      | Reference |
|-------------|-------------------------------------------------------------------------------------------|--------------------------|-----------|
| COMTD1      | catechol-O-methyltransferase domain containing 1                                          | DER (teen > adult)       | [36]      |
| COQ10B      | coenzyme Q10 homolog B ( <i>S. cerevisiae</i> )                                           | GWAS (PGC)               | [12]      |
| COQ3        | coenzyme Q3 homolog, methyltransferase ( <i>S. cerevisiae</i> )                           | Peak Expression (15-25y) | [35]      |
| COQ5        | coenzyme Q5 homolog, methyltransferase ( <i>S. cerevisiae</i> )                           | Peak Expression (15-25y) | [35]      |
| COX10       | COX10 homolog, cytochrome c oxidase assembly protein, heme A: farnesyltransferase (yeast) | CNV                      | [18]      |
| COX11       | COX11 homolog, cytochrome c oxidase assembly protein (yeast)                              | Peak Expression (15-25y) | [35]      |
| COX15       | COX15 homolog, cytochrome c oxidase assembly protein (yeast)                              | Peak Expression (15-25y) | [35]      |
| COX4I1      | cytochrome c oxidase subunit IV isoform 1                                                 | <i>de novo</i> mutation  | [14]      |
| COX5B       | cytochrome c oxidase subunit Vb                                                           | Peak Expression (15-25y) | [35]      |
| COX6A2      | cytochrome c oxidase subunit VIa polypeptide 2                                            | Peak Expression (15-25y) | [35]      |
| COX6B2      | cytochrome c oxidase subunit VIb polypeptide 2 (testis)                                   | Peak Expression (15-25y) | [35]      |
| COX7A1      | cytochrome c oxidase subunit VIIa polypeptide 1 (muscle)                                  | RNA (DLPFC pyramidal)    | [5]       |
| COX7B       | cytochrome c oxidase subunit VIIb                                                         | RNA (DLPFC pyramidal)    | [5]       |
| COX7C       | cytochrome c oxidase subunit VIIc                                                         | RNA (DLPFC pyramidal)    | [5]       |
| COX8A       | cytochrome c oxidase subunit 8A (ubiquitous)                                              | RNA (DLPFC pyramidal)    | [5]       |
| CPOX        | coproporphyrinogen oxidase                                                                | Peak Expression (15-25y) | [35]      |
| CS          | citrate synthase                                                                          | Protein (ACC)            | [37]      |
| CYB5B       | cytochrome b5 type B (outer mitochondrial membrane)                                       | CNV                      | [18]      |
| CYB5B       | cytochrome b5 type B (outer mitochondrial membrane)                                       | Peak Expression (15-25y) | [35]      |
| CYB5R1      | cytochrome b5 reductase 1                                                                 | Peak Expression (15-25y) | [35]      |
| DAP3        | death associated protein 3                                                                | DER (teen > adult)       | [36]      |
| DARS2       | aspartyl-tRNA synthetase 2 (mitochondrial)                                                | DER (teen > adult)       | [36]      |
| DARS2       | aspartyl-tRNA synthetase 2 (mitochondrial)                                                | DER (teen > child)       | [36]      |
| DDAH1       | dimethylarginine dimethylaminohydrolase 1                                                 | Protein (DLPFC/ACC/CC)   | [37]      |
| DDX28       | DEAD (Asp-Glu-Ala-Asp) box polypeptide 28                                                 | GWAS (PGC)               | [12]      |
| DLD         | dihydrolipoamide dehydrogenase                                                            | RNA (DLPFC pyramidal)    | [5]       |
| DLD         | dihydrolipoamide dehydrogenase                                                            | Peak Expression (15-25y) | [35]      |
| DNAJA3      | DnaJ (Hsp40) homolog, subfamily A, member 3                                               | Peak Expression (15-25y) | [35]      |
| DRG2        | developmentally regulated GTP binding protein 2                                           | GWAS (PGC)               | [12]      |
| DUS2L       | dihydrouridine synthase 2-like, SMM1 homolog ( <i>S. cerevisiae</i> )                     | GWAS (PGC)               | [12]      |
| DUSP26      | dual specificity phosphatase 26 (putative)                                                | Peak Expression (15-25y) | [35]      |
| DUT         | dUTP pyrophosphatase                                                                      | Peak Expression (15-25y) | [35]      |
| EARS2       | glutamyl-tRNA synthetase 2 (mitochondrial)(putative)                                      | <i>de novo</i> mutation  | [14]      |
| ECHDC3      | enoyl Coenzyme A hydratase domain containing 3                                            | Peak Expression (15-25y) | [35]      |
| ECSIT       | ECSIT homolog ( <i>Drosophila</i> )                                                       | Peak Expression (15-25y) | [35]      |
| EFHD1       | EF-hand domain family, member D1                                                          | GWAS (PGC)               | [12]      |
| ELN         | elastin (supravalvular aortic stenosis, Williams-Beuren syndrome)                         | Peak Expression (15-25y) | [35]      |

| Gene Symbol | Description                                                                       | SZ Association Type      | Reference |
|-------------|-----------------------------------------------------------------------------------|--------------------------|-----------|
| ETFFA       | electron-transfer-flavoprotein, alpha polypeptide (glutaric aciduria II)          | RNA (DLPFC pyramidal)    | [5]       |
| FAHD2A      | fumarylacetoacetate hydrolase domain containing 2A                                | Peak Expression (15-25y) | [35]      |
| FH          | fumarate hydratase                                                                | Peak Expression (15-25y) | [35]      |
| FIS1        | fission 1 (mitochondrial outer membrane) homolog (S. cerevisiae)                  | Peak Expression (15-25y) | [35]      |
| FOXRED1     | FAD-dependent oxidoreductase domain containing 1                                  | <i>de novo</i> mutation  | [14]      |
| FTH1        | ferritin, heavy polypeptide 1                                                     | Protein (CC)             | [37]      |
| FXC1        | fracture callus 1 homolog (rat)                                                   | Peak Expression (15-25y) | [35]      |
| GFM1        | G elongation factor, mitochondrial 1                                              | Peak Expression (15-25y) | [35]      |
| GLDC        | glycine dehydrogenase (decarboxylating)                                           | Peak Expression (15-25y) | [35]      |
| GLRX2       | glutaredoxin 2                                                                    | Peak Expression (15-25y) | [35]      |
| GLS         | glutaminase                                                                       | Peak Expression (15-25y) | [35]      |
| GLUD1       | glutamate dehydrogenase 1                                                         | Rare mutation            | [15]      |
| GOT2        | glutamic-oxaloacetic transaminase 2, mitochondrial (aspartate aminotransferase 2) | CNV                      | [18]      |
| GOT2        | glutamic-oxaloacetic transaminase 2, mitochondrial (aspartate aminotransferase 2) | RNA (PFC area 9)         | [13]      |
| GOT2        | glutamic-oxaloacetic transaminase 2, mitochondrial (aspartate aminotransferase 2) | Peak Expression (15-25y) | [35]      |
| GPD1        | glycerol-3-phosphate dehydrogenase 1 (soluble)                                    | Protein (ACC)            | [37]      |
| GPD2        | glycerol-3-phosphate dehydrogenase 2 (mitochondrial)                              | Peak Expression (15-25y) | [35]      |
| GPX1        | glutathione peroxidase 1                                                          | Protein (DLPFC)          | [37]      |
| GRSF1       | G-rich RNA sequence binding factor 1                                              | Peak Expression (15-25y) | [35]      |
| GSTK1       | glutathione S-transferase kappa 1                                                 | Peak Expression (15-25y) | [35]      |
| GTPBP3      | GTP binding protein 3 (mitochondrial)                                             | <i>de novo</i> mutation  | [14]      |
| GTPBP5      | GTP binding protein 5 (putative)                                                  | <i>de novo</i> mutation  | [14]      |
| HADH        | hydroxyacyl-Coenzyme A dehydrogenase                                              | DER (teen > adult)       | [36]      |
| HADH        | hydroxyacyl-Coenzyme A dehydrogenase                                              | DER (teen > child)       | [36]      |
| HAGH        | hydroxyacylglutathione hydrolase                                                  | Protein (ACC)            | [37]      |
| HBXIP       | hepatitis B virus x interacting protein                                           | Peak Expression (15-25y) | [35]      |
| HIBADH      | 3-hydroxyisobutyrate dehydrogenase                                                | Protein (DLPFC)          | [37]      |
| HIBADH      | 3-hydroxyisobutyrate dehydrogenase                                                | Peak Expression (15-25y) | [35]      |
| HIGD1A      | HIG1 domain family, member 1A                                                     | Peak Expression (15-25y) | [35]      |
| HK1         | hexokinase 1                                                                      | Protein (DLPFC)          | [37]      |
| HSD17B4     | hydroxysteroid (17-beta) dehydrogenase 4                                          | CNV                      | [18]      |
| HSDL1       | hydroxysteroid dehydrogenase like 1                                               | CNV                      | [18]      |
| HSDL1       | hydroxysteroid dehydrogenase like 1                                               | DER (teen > adult)       | [36]      |
| HSPA9       | heat shock 70kDa protein 9 (mortalin)                                             | GWAS (PGC)               | [12]      |
| HSPD1       | heat shock 60kDa protein 1 (chaperonin)                                           | GWAS (PGC)               | [12]      |
| HSPD1       | heat shock 60kDa protein 1 (chaperonin)                                           | Protein (DLPFC)          | [37]      |
| HSPE1       | heat shock 10kDa protein 1 (chaperonin 10)                                        | GWAS (PGC)               | [12]      |

| Gene Symbol | Description                                                               | SZ Association Type      | Reference |
|-------------|---------------------------------------------------------------------------|--------------------------|-----------|
| IDH1        | isocitrate dehydrogenase 1 (NADP+), soluble                               | Peak Expression (15-25y) | [35]      |
| IDH3A       | isocitrate dehydrogenase 3 (NAD+) alpha                                   | RNA (DLPFC pyramidal)    | [5]       |
| IDH3A       | isocitrate dehydrogenase 3 (NAD+) alpha                                   | RNA (DG)                 | [34]      |
| IDH3A       | isocitrate dehydrogenase 3 (NAD+) alpha                                   | Protein (ACC)            | [37]      |
| IDH3B       | isocitrate dehydrogenase 3 (NAD+) beta                                    | RNA (DLPFC pyramidal)    | [5]       |
| IDH3B       | isocitrate dehydrogenase 3 (NAD+) beta                                    | Peak Expression (15-25y) | [35]      |
| IMMP2L      | IMP2 inner mitochondrial membrane peptidase-like ( <i>S. cerevisiae</i> ) | GWAS (PGC)               | [12]      |
| IMMT        | inner membrane protein, mitochondrial (mitofilin)                         | Protein (ACC)            | [37]      |
| IMMT        | inner membrane protein, mitochondrial (mitofilin)                         | DER (teen > child)       | [36]      |
| IREB2       | iron-responsive element binding protein 2                                 | GWAS (PGC)               | [12]      |
| IVD         | isovaleryl Coenzyme A dehydrogenase                                       | Peak Expression (15-25y) | [35]      |
| KYNU        | kynureninase (L-kynurenine hydrolase)                                     | Rare mutation            | [15]      |
| KYNU        | kynureninase (L-kynurenine hydrolase)                                     | Peak Expression (15-25y) | [35]      |
| LACTB2      | lactamase, beta 2                                                         | Peak Expression (15-25y) | [35]      |
| LAP3        | leucine aminopeptidase 3                                                  | Protein (DLPFC)          | [37]      |
| LDHA        | lactate dehydrogenase A                                                   | RNA (DG)                 | [34]      |
| LDHB        | lactate dehydrogenase B                                                   | Protein (ACC/CC)         | [37]      |
| LIAS        | lipoic acid synthetase                                                    | Peak Expression (15-25y) | [35]      |
| LIPT1       | lipoyltransferase 1                                                       | Peak Expression (15-25y) | [35]      |
| LOC339229   | hypothetical protein LOC339229                                            | Peak Expression (15-25y) | [35]      |
| LONP1       | lon peptidase 1, mitochondrial                                            | <i>de novo</i> mutation  | [14]      |
| LYRM2       | LYR motif containing 2                                                    | CNV                      | [18]      |
| LYRM7       | Lyrm7 homolog (mouse)                                                     | DER (teen > adult)       | [36]      |
| MARS2       | methionine-tRNA synthetase 2 (mitochondrial)                              | GWAS (PGC)               | [12]      |
| MCART1      | mitochondrial carrier triple repeat 1                                     | Peak Expression (15-25y) | [35]      |
| MCEE        | methylmalonyl CoA epimerase                                               | Peak Expression (15-25y) | [35]      |
| MDH1        | malate dehydrogenase 1, NAD (soluble)                                     | RNA (PFC area 9)         | [13]      |
| MDH1        | malate dehydrogenase 1, NAD (soluble)                                     | Protein (DLPFC)          | [37]      |
| MDH1        | malate dehydrogenase 1, NAD (soluble)                                     | DER (teen > child)       | [36]      |
| MDH2        | malate dehydrogenase 2, NAD (mitochondrial)                               | <i>de novo</i> CNV       | [19]      |
| MDH2        | malate dehydrogenase 2, NAD (mitochondrial)                               | CNV                      | [18]      |
| MDH2        | malate dehydrogenase 2, NAD (mitochondrial)                               | RNA (DLPFC pyramidal)    | [5]       |
| MDH2        | malate dehydrogenase 2, NAD (mitochondrial)                               | RNA (DG)                 | [34]      |
| ME1         | malic enzyme 1, NADP(+)-dependent, cytosolic                              | Peak Expression (15-25y) | [35]      |
| ME2         | malic enzyme 2, NAD(+)-dependent, mitochondrial                           | DER (teen > adult)       | [36]      |
| MFN2        | mitofusin 2                                                               | Peak Expression (15-25y) | [35]      |
| MIPEP       | mitochondrial intermediate peptidase                                      | CNV                      | [18]      |

| Gene Symbol     | Description                                                                      | SZ Association Type      | Reference |
|-----------------|----------------------------------------------------------------------------------|--------------------------|-----------|
| <i>MLYCD</i>    | malonyl-CoA decarboxylase                                                        | CNV                      | [18]      |
| <i>MPST</i>     | mercaptopyruvate sulfurtransferase                                               | DER (teen > adult)       | [36]      |
| <i>MPST</i>     | mercaptopyruvate sulfurtransferase                                               | DER (teen > child)       | [36]      |
| <i>MRM1</i>     | mitochondrial rRNA methyltransferase 1 homolog ( <i>S. cerevisiae</i> )          | Peak Expression (15-25y) | [35]      |
| <i>MRPL22</i>   | mitochondrial ribosomal protein L22                                              | Peak Expression (15-25y) | [35]      |
| <i>MRPL27</i>   | mitochondrial ribosomal protein L27                                              | <i>de novo</i> mutation  | [14]      |
| <i>MRPL30</i>   | mitochondrial ribosomal protein L30                                              | Peak Expression (15-25y) | [35]      |
| <i>MRPL33</i>   | mitochondrial ribosomal protein L33                                              | Peak Expression (15-25y) | [35]      |
| <i>MRPL37</i>   | mitochondrial ribosomal protein L37                                              | DER (teen > adult)       | [36]      |
| <i>MRPL39</i>   | mitochondrial ribosomal protein L39                                              | CNV                      | [18]      |
| <i>MRPL40</i>   | mitochondrial ribosomal protein L40                                              | CNV (22q11.2)            | [32]      |
| <i>MRPL40</i>   | mitochondrial ribosomal protein L40                                              | CNV                      | [18]      |
| <i>MRPL42</i>   | mitochondrial ribosomal protein L42                                              | DER (teen > adult)       | [36]      |
| <i>MRPL46</i>   | mitochondrial ribosomal protein L46                                              | Peak Expression (15-25y) | [35]      |
| <i>MRPL48</i>   | mitochondrial ribosomal protein L48                                              | Peak Expression (15-25y) | [35]      |
| <i>MRPL51</i>   | mitochondrial ribosomal protein L51                                              | Peak Expression (15-25y) | [35]      |
| <i>MRPS18C</i>  | mitochondrial ribosomal protein S18C                                             | Peak Expression (15-25y) | [35]      |
| <i>MRPS30</i>   | mitochondrial ribosomal protein S30                                              | DER (teen > adult)       | [36]      |
| <i>MRPS30</i>   | mitochondrial ribosomal protein S30                                              | DER (teen > child)       | [36]      |
| <i>MRPS9</i>    | mitochondrial ribosomal protein S9                                               | Peak Expression (15-25y) | [35]      |
| <i>MRPS9</i>    | mitochondrial ribosomal protein S9                                               | DER (teen > adult)       | [36]      |
| <i>MRS2L</i>    | MRS2-like, magnesium homeostasis factor ( <i>S. cerevisiae</i> )                 | Peak Expression (15-25y) | [35]      |
| <i>MSRA</i>     | methionine sulfoxide reductase A                                                 | CNV                      | [18]      |
| <i>MTG1</i>     | mitochondrial GTPase 1 homolog ( <i>S. cerevisiae</i> )                          | DER (teen > adult)       | [36]      |
| <i>MTHFS</i>    | 5,10-methenyltetrahydrofolate synthetase (5-formyltetrahydrofolate cyclo-ligase) | Peak Expression (15-25y) | [35]      |
| <i>MTIF2</i>    | mitochondrial translational initiation factor 2                                  | Peak Expression (15-25y) | [35]      |
| <i>MTIF3</i>    | mitochondrial translational initiation factor 3                                  | Peak Expression (15-25y) | [35]      |
| <i>MTO1</i>     | mitochondrial translation optimization 1 homolog ( <i>S. cerevisiae</i> )        | Peak Expression (15-25y) | [35]      |
| <i>MTRF1</i>    | mitochondrial translational release factor 1                                     | CNV                      | [18]      |
| <i>MULK</i>     | multiple substrate lipid kinase                                                  | Peak Expression (15-25y) | [35]      |
| <i>NAGS</i>     | N-acetylglutamate synthase                                                       | Protein (ACC)            | [37]      |
| <i>NDUFA10</i>  | NADH dehydrogenase (ubiquinone) 1 alpha subcomplex, 10, 42kDa                    | Peak Expression (15-25y) | [35]      |
| <i>NDUFA11</i>  | NADH dehydrogenase (ubiquinone) 1 alpha subcomplex, 11, 14.7kDa                  | RNA (DLPFC pyramidal)    | [5]       |
| <i>NDUFA12L</i> | NDUFA12-like                                                                     | Peak Expression (15-25y) | [35]      |
| <i>NDUFA13</i>  | NADH dehydrogenase (ubiquinone) 1 alpha subcomplex, 13                           | GWAS (PGC)               | [12]      |
| <i>NDUFA13</i>  | NADH dehydrogenase (ubiquinone) 1 alpha subcomplex, 13                           | Peak Expression (15-25y) | [35]      |
| <i>NDUFA2</i>   | NADH dehydrogenase (ubiquinone) 1 alpha subcomplex, 2, 8kDa                      | GWAS (PGC)               | [12]      |

| Gene Symbol      | Description                                                                       | SZ Association Type      | Reference |
|------------------|-----------------------------------------------------------------------------------|--------------------------|-----------|
| <i>NDUFA2</i>    | NADH dehydrogenase (ubiquinone) 1 alpha subcomplex, 2, 8kDa                       | RNA (DLPFC pyramidal)    | [5]       |
| <i>NDUFA2</i>    | NADH dehydrogenase (ubiquinone) 1 alpha subcomplex, 2, 8kDa                       | Protein (DLPFC)          | [37]      |
| <i>NDUFA5</i>    | NADH dehydrogenase (ubiquinone) 1 alpha subcomplex, 5, 13kDa                      | Protein (ACC)            | [37]      |
| <i>NDUFA6</i>    | NADH dehydrogenase (ubiquinone) 1 alpha subcomplex, 6, 14kDa                      | GWAS (PGC)               | [12]      |
| <i>NDUFA6</i>    | NADH dehydrogenase (ubiquinone) 1 alpha subcomplex, 6, 14kDa                      | RNA (DLPFC pyramidal)    | [5]       |
| <i>NDUFA7</i>    | NADH dehydrogenase (ubiquinone) 1 alpha subcomplex, 7, 14.5kDa                    | DER (teen > adult)       | [36]      |
| <i>NDUFA7</i>    | NADH dehydrogenase (ubiquinone) 1 alpha subcomplex, 7, 14.5kDa                    | DER (teen > child)       | [36]      |
| <i>NDUFA8</i>    | NADH dehydrogenase (ubiquinone) 1 alpha subcomplex, 8, 19kDa                      | RNA (DLPFC pyramidal)    | [5]       |
| <i>NDUFB10</i>   | NADH dehydrogenase (ubiquinone) 1 beta subcomplex, 10, 22kDa                      | Peak Expression (15-25y) | [35]      |
| <i>NDUFB2</i>    | NADH dehydrogenase (ubiquinone) 1 beta subcomplex, 2, 8kDa                        | RNA (DG)                 | [34]      |
| <i>NDUFB3</i>    | NADH dehydrogenase (ubiquinone) 1 beta subcomplex, 3, 12kDa                       | RNA (DLPFC pyramidal)    | [5]       |
| <i>NDUFB5</i>    | NADH dehydrogenase (ubiquinone) 1 beta subcomplex, 5, 16kDa                       | RNA (DG)                 | [34]      |
| <i>NDUFB5</i>    | NADH dehydrogenase (ubiquinone) 1 beta subcomplex, 5, 16kDa                       | DER (teen > child)       | [36]      |
| <i>NDUFB6</i>    | NADH dehydrogenase (ubiquinone) 1 beta subcomplex, 6, 17kDa                       | RNA (DLPFC pyramidal)    | [5]       |
| <i>NDUFB7</i>    | NADH dehydrogenase (ubiquinone) 1 beta subcomplex, 7, 18kDa                       | RNA (DLPFC pyramidal)    | [5]       |
| <i>NDUFB9</i>    | NADH dehydrogenase (ubiquinone) 1 beta subcomplex, 9, 22kDa                       | RNA (DLPFC pyramidal)    | [5]       |
| <i>NDUFB9</i>    | NADH dehydrogenase (ubiquinone) 1 beta subcomplex, 9, 22kDa                       | Peak Expression (15-25y) | [35]      |
| <i>NDUFC1</i>    | NADH dehydrogenase (ubiquinone) 1, subcomplex unknown, 1, 6kDa                    | RNA (DLPFC pyramidal)    | [5]       |
| <i>NDUFS1</i>    | NADH dehydrogenase (ubiquinone) Fe-S protein 1, 75kDa (NADH-coenzyme Q reductase) | GWAS (early onset)       | [33]      |
| <i>NDUFS1</i>    | NADH dehydrogenase (ubiquinone) Fe-S protein 1, 75kDa (NADH-coenzyme Q reductase) | Protein (DLPFC)          | [37]      |
| <i>NDUFS2</i>    | NADH dehydrogenase (ubiquinone) Fe-S protein 2, 49kDa (NADH-coenzyme Q reductase) | GWAS (early onset)       | [33]      |
| <i>NDUFS2</i>    | NADH dehydrogenase (ubiquinone) Fe-S protein 2, 49kDa (NADH-coenzyme Q reductase) | RNA (DLPFC pyramidal)    | [5]       |
| <i>NDUFS2</i>    | NADH dehydrogenase (ubiquinone) Fe-S protein 2, 49kDa (NADH-coenzyme Q reductase) | Peak Expression (15-25y) | [35]      |
| <i>NDUFS2</i>    | NADH dehydrogenase (ubiquinone) Fe-S protein 2, 49kDa (NADH-coenzyme Q reductase) | DER (teen > adult)       | [36]      |
| <i>NDUFS3</i>    | NADH dehydrogenase (ubiquinone) Fe-S protein 3, 30kDa (NADH-coenzyme Q reductase) | Protein (DLPFC)          | [37]      |
| <i>NDUFS4</i>    | NADH dehydrogenase (ubiquinone) Fe-S protein 4, 18kDa (NADH-coenzyme Q reductase) | RNA (DLPFC pyramidal)    | [5]       |
| <i>NDUFS4</i>    | NADH dehydrogenase (ubiquinone) Fe-S protein 4, 18kDa (NADH-coenzyme Q reductase) | RNA (DG)                 | [34]      |
| <i>NDUFS7</i>    | NADH dehydrogenase (ubiquinone) Fe-S protein 7, 20kDa (NADH-coenzyme Q reductase) | Peak Expression (15-25y) | [35]      |
| <i>NDUFV1</i>    | NADH dehydrogenase (ubiquinone) flavoprotein 1, 51kDa                             | RNA (DLPFC pyramidal)    | [5]       |
| <i>NDUFV1</i>    | NADH dehydrogenase (ubiquinone) flavoprotein 1, 51kDa                             | Peak Expression (15-25y) | [35]      |
| <i>NDUFV2</i>    | NADH dehydrogenase (ubiquinone) flavoprotein 2, 24kDa                             | RNA (DLPFC pyramidal)    | [5]       |
| <i>NDUFV2</i>    | NADH dehydrogenase (ubiquinone) flavoprotein 2, 24kDa                             | Protein (DLPFC)          | [37]      |
| <i>NEU4</i>      | sialidase 4                                                                       | Peak Expression (15-25y) | [35]      |
| <i>NFS1</i>      | NFS1 nitrogen fixation 1 homolog ( <i>S. cerevisiae</i> )                         | Peak Expression (15-25y) | [35]      |
| <i>NIPSNAP3B</i> | nipsnap homolog 3B ( <i>C. elegans</i> )                                          | Peak Expression (15-25y) | [35]      |
| <i>NME6</i>      | non-metastatic cells 6, protein expressed in (nucleoside-diphosphate kinase)      | DER (teen > adult)       | [36]      |
| <i>NT5C3</i>     | 5'-nucleotidase, cytosolic III                                                    | CNV                      | [18]      |

| Gene Symbol   | Description                                                 | SZ Association Type      | Reference |
|---------------|-------------------------------------------------------------|--------------------------|-----------|
| <i>NUDT2</i>  | nudix (nucleoside diphosphate linked moiety X)-type motif 2 | Peak Expression (15-25y) | [35]      |
| <i>OAT</i>    | ornithine aminotransferase (gyrate atrophy)                 | RNA (PFC area 9)         | [13]      |
| <i>OXCT1</i>  | 3-oxoacid CoA transferase 1                                 | RNA (PFC area 9)         | [13]      |
| <i>OXNAD1</i> | oxidoreductase NAD-binding domain containing 1              | Peak Expression (15-25y) | [35]      |
| <i>OXR1</i>   | oxidation resistance 1                                      | Peak Expression (15-25y) | [35]      |
| <i>OXR1</i>   | oxidation resistance 1                                      | DER (teen > child)       | [36]      |
| <i>PAK7</i>   | p21(CDKN1A)-activated kinase 7                              | Peak Expression (15-25y) | [35]      |
| <i>PARK7</i>  | Parkinson disease (autosomal recessive, early onset) 7      | Protein (ACC/CC)         | [37]      |
| <i>PC</i>     | pyruvate carboxylase                                        | Peak Expression (15-25y) | [35]      |
| <i>PCCB</i>   | propionyl Coenzyme A carboxylase, beta polypeptide          | GWAS (PGC)               | [12]      |
| <i>PDHA1</i>  | pyruvate dehydrogenase (lipoamide) alpha 1                  | Protein (DLPFC)          | [37]      |
| <i>PDHB</i>   | pyruvate dehydrogenase (lipoamide) beta                     | RNA (DLPFC pyramidal)    | [5]       |
| <i>PDHB</i>   | pyruvate dehydrogenase (lipoamide) beta                     | RNA (DG)                 | [34]      |
| <i>PDK2</i>   | pyruvate dehydrogenase kinase, isozyme 2                    | Peak Expression (15-25y) | [35]      |
| <i>PDK3</i>   | pyruvate dehydrogenase kinase, isozyme 3                    | DER (teen > adult)       | [36]      |
| <i>PDK3</i>   | pyruvate dehydrogenase kinase, isozyme 3                    | DER (teen > child)       | [36]      |
| <i>PEX11B</i> | peroxisomal biogenesis factor 11B                           | Peak Expression (15-25y) | [35]      |
| <i>PHB</i>    | prohibitin                                                  | Protein (ACC)            | [37]      |
| <i>PITRM1</i> | pitrilysin metallopeptidase 1                               | DER (teen > adult)       | [36]      |
| <i>PITRM1</i> | pitrilysin metallopeptidase 1                               | DER (teen > child)       | [36]      |
| <i>PMPCB</i>  | peptidase (mitochondrial processing) beta                   | Peak Expression (15-25y) | [35]      |
| <i>PNKD</i>   | paroxysmal nonkinesiogenic dyskinesia                       | Peak Expression (15-25y) | [35]      |
| <i>PNKD</i>   | paroxysmal nonkinesiogenic dyskinesia                       | DER (teen > child)       | [36]      |
| <i>POLRMT</i> | polymerase (RNA) mitochondrial (DNA directed)               | Peak Expression (15-25y) | [35]      |
| <i>PPA2</i>   | pyrophosphatase (inorganic) 2                               | RNA (DLPFC pyramidal)    | [5]       |
| <i>PPA2</i>   | pyrophosphatase (inorganic) 2                               | Protein (DLPFC)          | [37]      |
| <i>PPIF</i>   | peptidylprolyl isomerase F (cyclophilin F)                  | Peak Expression (15-25y) | [35]      |
| <i>PPM1K</i>  | protein phosphatase 1K (PP2C domain containing)             | DER (teen > adult)       | [36]      |
| <i>PPOX</i>   | protoporphyrinogen oxidase                                  | DER (teen > child)       | [36]      |
| <i>PRDX1</i>  | peroxiredoxin 1                                             | Rare mutation            | [15]      |
| <i>PRDX1</i>  | peroxiredoxin 1                                             | Protein (DLPFC)          | [37]      |
| <i>PRDX2</i>  | peroxiredoxin 2                                             | Rare mutation            | [15]      |
| <i>PRDX2</i>  | peroxiredoxin 2                                             | Protein (DLPFC/CC)       | [37]      |
| <i>PRODH</i>  | proline dehydrogenase (oxidase) 1                           | CNV (22q11.2)            | [32]      |
| <i>PRODH</i>  | proline dehydrogenase (oxidase) 1                           | CNV                      | [18]      |
| <i>PTCD3</i>  | Pentatricopeptide repeat domain 3                           | Peak Expression (15-25y) | [35]      |
| <i>PTRH2</i>  | peptidyl-tRNA hydrolase 2                                   | DER (teen > adult)       | [36]      |



| Gene Symbol | Description                                                                                 | SZ Association Type      | Reference |
|-------------|---------------------------------------------------------------------------------------------|--------------------------|-----------|
| PXMP2       | peroxisomal membrane protein 2, 22kDa                                                       | CNV                      | [18]      |
| PYCR1       | pyrroline-5-carboxylate reductase 1                                                         | Peak Expression (15-25y) | [35]      |
| QDPR        | quinoid dihydropteridine reductase                                                          | Protein (DLPFC)          | [37]      |
| QDPR        | quinoid dihydropteridine reductase                                                          | Peak Expression (15-25y) | [35]      |
| QDPR        | quinoid dihydropteridine reductase                                                          | DER (teen > child)       | [36]      |
| RAB8B       | RAB8B, member RAS oncogene family                                                           | DER (teen > adult)       | [36]      |
| RAB8B       | RAB8B, member RAS oncogene family                                                           | DER (teen > child)       | [36]      |
| RG9MTD1     | RNA (guanine-9-) methyltransferase domain containing 1                                      | CNV                      | [18]      |
| RNMTL1      | RNA methyltransferase like 1                                                                | CNV                      | [18]      |
| RNMTL1      | RNA methyltransferase like 1                                                                | DER (teen > adult)       | [36]      |
| RPL34       | ribosomal protein L34                                                                       | DER (teen > adult)       | [36]      |
| SARS        | seryl-tRNA synthetase                                                                       | Peak Expression (15-25y) | [35]      |
| SCCPDH      | saccharopine dehydrogenase (putative)                                                       | Peak Expression (15-25y) | [35]      |
| SCO1        | SCO cytochrome oxidase deficient homolog 1 (yeast)                                          | RNA (DG)                 | [34]      |
| SCP2        | sterol carrier protein 2                                                                    | Peak Expression (15-25y) | [35]      |
| SDHA        | succinate dehydrogenase complex, subunit A, flavoprotein (Fp)                               | RNA (DG)                 | [34]      |
| SDHA        | succinate dehydrogenase complex, subunit A, flavoprotein (Fp)                               | Protein (ACC)            | [37]      |
| SDHB        | succinate dehydrogenase complex, subunit B, iron sulfur (Ip)                                | RNA (DLPFC pyramidal)    | [5]       |
| SFXN2       | sideroflexin 2                                                                              | GWAS (PGC)               | [12]      |
| SFXN2       | sideroflexin 2                                                                              | DER (teen > child)       | [36]      |
| SFXN4       | sideroflexin 4                                                                              | Peak Expression (15-25y) | [35]      |
| SHMT1       | serine hydroxymethyltransferase 1 (soluble)                                                 | Peak Expression (15-25y) | [35]      |
| SHMT1       | serine hydroxymethyltransferase 1 (soluble)                                                 | DER (teen > adult)       | [36]      |
| SHMT2       | serine hydroxymethyltransferase 2 (mitochondrial)                                           | GWAS (PGC)               | [12]      |
| SLC25A1     | solute carrier family 25 (mitochondrial carrier; citrate transporter), member 1             | CNV (22q11.2)            | [32]      |
| SLC25A1     | solute carrier family 25 (mitochondrial carrier; citrate transporter), member 1             | CNV                      | [18]      |
| SLC25A12    | solute carrier family 25 (mitochondrial carrier, Aralar), member 12                         | <i>de novo</i> mutation  | [14]      |
| SLC25A16    | solute carrier family 25 (mitochondrial carrier; Graves disease autoantigen), member 16     | DER (teen > adult)       | [36]      |
| SLC25A19    | solute carrier family 25 (mitochondrial deoxynucleotide carrier), member 19                 | Peak Expression (15-25y) | [35]      |
| SLC25A23    | solute carrier family 25 (mitochondrial carrier; phosphate carrier), member 23              | <i>de novo</i> mutation  | [14]      |
| SLC25A27    | solute carrier family 25, member 27                                                         | Peak Expression (15-25y) | [35]      |
| SLC25A29    | solute carrier family 25, member 29                                                         | DER (teen > adult)       | [36]      |
| SLC25A3     | solute carrier family 25 (mitochondrial carrier; phosphate carrier), member 3               | Rare mutation            | [15]      |
| SLC25A3     | solute carrier family 25 (mitochondrial carrier; phosphate carrier), member 3               | Peak Expression (15-25y) | [35]      |
| SLC25A32    | solute carrier family 25, member 32                                                         | Peak Expression (15-25y) | [35]      |
| SLC25A34    | solute carrier family 25, member 34                                                         | Peak Expression (15-25y) | [35]      |
| SLC25A4     | solute carrier family 25 (mitochondrial carrier; adenine nucleotide translocator), member 4 | RNA (DLPFC pyramidal)    | [5]       |

| Gene Symbol    | Description                                                                                 | SZ Association Type      | Reference |
|----------------|---------------------------------------------------------------------------------------------|--------------------------|-----------|
| <i>SLC25A4</i> | solute carrier family 25 (mitochondrial carrier; adenine nucleotide translocator), member 4 | RNA (DG)                 | [34]      |
| <i>SND1</i>    | staphylococcal nuclease domain containing 1                                                 | <i>de novo</i> mutation  | [14]      |
| <i>SOD1</i>    | superoxide dismutase 1, soluble (amyotrophic lateral sclerosis 1 (adult))                   | Peak Expression (15-25y) | [35]      |
| <i>SPG7</i>    | spastic paraplegia 7, paraplegin (pure and complicated autosomal recessive)                 | Peak Expression (15-25y) | [35]      |
| <i>SPTLC2</i>  | serine palmitoyltransferase, long chain base subunit 2                                      | Peak Expression (15-25y) | [35]      |
| <i>STAR</i>    | steroidogenic acute regulator                                                               | DER (teen > child)       | [36]      |
| <i>SUCLA2</i>  | succinate-CoA ligase, ADP-forming, beta subunit                                             | Rare mutation            | [15]      |
| <i>TATDN3</i>  | TatD DNase domain containing 3                                                              | Peak Expression (15-25y) | [35]      |
| <i>TDRKH</i>   | tudor and KH domain containing                                                              | <i>de novo</i> mutation  | [14]      |
| <i>TDRKH</i>   | tudor and KH domain containing                                                              | DER (teen > child)       | [36]      |
| <i>THEM5</i>   | thioesterase superfamily member 5                                                           | DER (teen > child)       | [36]      |
| <i>TIMM17A</i> | translocase of inner mitochondrial membrane 17 homolog A (yeast)                            | RNA (DG)                 | [34]      |
| <i>TIMM17A</i> | translocase of inner mitochondrial membrane 17 homolog A (yeast)                            | RNA (PFC area 9)         | [13]      |
| <i>TIMM22</i>  | translocase of inner mitochondrial membrane 22 homolog (yeast)                              | Peak Expression (15-25y) | [35]      |
| <i>TIMM8A</i>  | translocase of inner mitochondrial membrane 8 homolog A (yeast)                             | Peak Expression (15-25y) | [35]      |
| <i>TIMM8B</i>  | translocase of inner mitochondrial membrane 8 homolog B (yeast)                             | Peak Expression (15-25y) | [35]      |
| <i>TMEM11</i>  | transmembrane protein 11                                                                    | DER (teen > adult)       | [36]      |
| <i>TMEM11</i>  | transmembrane protein 11                                                                    | DER (teen > child)       | [36]      |
| <i>TMEM14C</i> | transmembrane protein 14C                                                                   | Peak Expression (15-25y) | [35]      |
| <i>TMEM70</i>  | transmembrane protein 70                                                                    | Peak Expression (15-25y) | [35]      |
| <i>TMTC1</i>   | transmembrane and tetratricopeptide repeat containing 1                                     | GWAS (PGC)               | [12]      |
| <i>TOMM20</i>  | translocase of outer mitochondrial membrane 20 homolog (yeast)                              | Peak Expression (15-25y) | [35]      |
| <i>TOMM70A</i> | translocase of outer mitochondrial membrane 70 homolog A ( <i>S. cerevisiae</i> )           | CNV                      | [18]      |
| <i>TRAP1</i>   | TNF receptor-associated protein 1                                                           | Peak Expression (15-25y) | [35]      |
| <i>TUFM</i>    | Tu translation elongation factor, mitochondrial                                             | CNV                      | [18]      |
| <i>TUFM</i>    | Tu translation elongation factor, mitochondrial                                             | Protein (DLPFC)          | [37]      |
| <i>TXN</i>     | thioredoxin                                                                                 | Protein (DLPFC)          | [37]      |
| <i>TXNRD2</i>  | thioredoxin reductase 2                                                                     | CNV (22q11.2)            | [32]      |
| <i>TXNRD2</i>  | thioredoxin reductase 2                                                                     | CNV                      | [18]      |
| <i>UQCRC1</i>  | ubiquinol-cytochrome c reductase core protein I                                             | Protein (DLPFC)          | [37]      |
| <i>UQCRC1</i>  | ubiquinol-cytochrome c reductase core protein I                                             | DER (teen > child)       | [36]      |
| <i>UQCRC2</i>  | ubiquinol-cytochrome c reductase core protein II                                            | CNV                      | [18]      |
| <i>UQCRFS1</i> | ubiquinol-cytochrome c reductase, Rieske iron-sulfur polypeptide 1                          | RNA (DLPFC pyramidal)    | [5]       |
| <i>UQCRFS1</i> | ubiquinol-cytochrome c reductase, Rieske iron-sulfur polypeptide 1                          | RNA (DG)                 | [34]      |
| <i>UQCRQ</i>   | ubiquinol-cytochrome c reductase, complex III subunit VII, 9.5kDa                           | RNA (DLPFC pyramidal)    | [5]       |
| <i>USMG5</i>   | upregulated during skeletal muscle growth 5 homolog (mouse)                                 | GWAS (PGC)               | [12]      |
| <i>USMG5</i>   | upregulated during skeletal muscle growth 5 homolog (mouse)                                 | DER (teen > adult)       | [36]      |

| <b>Gene Symbol</b> | <b>Description</b>                                      | <b>SZ Association Type</b> | <b>Reference</b> |
|--------------------|---------------------------------------------------------|----------------------------|------------------|
| VAMP1              | vesicle-associated membrane protein 1 (synaptobrevin 1) | Peak Expression (15-25y)   | [35]             |
| VAMP1              | vesicle-associated membrane protein 1 (synaptobrevin 1) | DER (teen > child)         | [36]             |
| VDAC1              | voltage-dependent anion channel 1                       | <i>de novo</i> mutation    | [14]             |
| VDAC1              | voltage-dependent anion channel 1                       | Protein (DLPFC)            | [37]             |
| VDAC2              | voltage-dependent anion channel 2                       | Protein (DLPFC)            | [37]             |

**Key:** CNV (copy number variant), DLPFC (dorsolateral prefrontal cortex), DG (dentate gyrus), GWAS (genome-wide association study), DER (differentially expressed regions), PFC (prefrontal cortex), ACC (anterior cingulate cortex), PGC (psychiatric genomics consortium), CC (corpus callosum).

**References:**

- [5] Arion D, Corradi JP, Tang S, Datta D, Boothe F, He A, Cacace AM, Zaczek R, Albright CF, Tseng G, Lewis DA. Distinctive transcriptome alterations of prefrontal pyramidal neurons in schizophrenia and schizoaffective disorder. *Molecular psychiatry*. 2015; DOI: 10.1038/mp.2014.171.
- [12] Schizophrenia Working Group of the Psychiatric Genomics Consortium. Biological insights from 108 schizophrenia-associated genetic loci. *Nature*. 2014;511(7510):421-427.
- [13] Middleton FA, Mirnics K, Pierri JN, Lewis DA, Levitt P. Gene expression profiling reveals alterations of specific metabolic pathways in schizophrenia. *J Neurosci*. 2002;22(7):2718-2729.

- [14] Fromer M, Pocklington AJ, Kavanagh DH, Williams HJ, Dwyer S, Gormley P, Georgieva L, Rees E, Palta P, Ruderfer DM, Carrera N, Humphreys I, Johnson JS, Roussos P, Barker DD, Banks E, Milanova V, Grant SG, Hannon E, Rose SA, Chambert K, Mahajan M, Scolnick EM, Moran JL, Kirov G, Palotie A, McCarroll SA, Holmans P, Sklar P, Owen MJ, Purcell SM, O'Donovan MC. De novo mutations in schizophrenia implicate synaptic networks. *Nature*. 2014;506(7487):179-184.
- [15] Purcell SM, Moran JL, Fromer M, Ruderfer D, Solovieff N, Roussos P, O'Dushlaine C, Chambert K, Bergen SE, Kahler A, Duncan L, Stahl E, Genovese G, Fernandez E, Collins MO, Komiyama NH, Choudhary JS, Magnusson PK, Banks E, Shakir K, Garimella K, Fennell T, DePristo M, Grant SG, Haggarty SJ, Gabriel S, Scolnick EM, Lander ES, Hultman CM, Sullivan PF, McCarroll SA, Sklar P. A polygenic burden of rare disruptive mutations in schizophrenia. *Nature*. 2014;506(7487):185-190.
- [18] Szatkiewicz JP, O'Dushlaine C, Chen G, Chambert K, Moran JL, Neale BM, Fromer M, Ruderfer D, Akterin S, Bergen SE, Kahler A, Magnusson PK, Kim Y, Crowley JJ, Rees E, Kirov G, O'Donovan MC, Owen MJ, Walters J, Scolnick E, Sklar P, Purcell S, Hultman CM, McCarroll SA, Sullivan PF. Copy number variation in schizophrenia in Sweden. *Molecular psychiatry*. 2014;19:762-773.
- [19] Kirov G, Pocklington AJ, Holmans P, Ivanov D, Ikeda M, Ruderfer D, Moran J, Chambert K, Toncheva D, Georgieva L, Grozeva D, Fjodorova M, Wollerton R, Rees E, Nikolov I, van de Lagemaat LN, Bayes A, Fernandez E, Olason PI, Bottcher Y, Komiyama NH, Collins MO, Choudhary J, Stefansson K, Stefansson H, Grant SG, Purcell S, Sklar P, O'Donovan MC, Owen MJ. De novo CNV analysis implicates specific abnormalities of postsynaptic signalling complexes in the pathogenesis of schizophrenia. *Molecular psychiatry*. 2012;17(2):142-153.

- [32] Karayiorgou M, Simon TJ, Gogos JA. 22q11.2 microdeletions: linking DNA structural variation to brain dysfunction and schizophrenia. *Nat Rev Neurosci*. 2010;11(6):402-416.
- [33] Li X, Zhang W, Tang J, Tan L, Luo XJ, Chen X, Yao YG. Do nuclear-encoded core subunits of mitochondrial complex I confer genetic susceptibility to schizophrenia in Han Chinese populations? *Sci Rep*. 2015;5:11076.
- [34] Altar CA, Jurata LW, Charles V, Lemire A, Liu P, Bukhman Y, Young TA, Bullard J, Yokoe H, Webster MJ, Knable MB, Brockman JA. Deficient hippocampal neuron expression of proteasome, ubiquitin, and mitochondrial genes in multiple schizophrenia cohorts. *Biol Psychiatry*. 2005;58(2):85-96.
- [35] Harris LW, Lockstone HE, Khaitovich P, Weickert CS, Webster MJ, Bahn S. Gene expression in the prefrontal cortex during adolescence: implications for the onset of schizophrenia. *BMC Med Genomics*. 2009;2:28.

- [36] Jaffe AE, Shin J, Collado-Torres L, Leek JT, Tao R, Li C, Gao Y, Jia Y, Maher BJ, Hyde TM, Kleinman JE, Weinberger DR. Developmental regulation of human cortex transcription and its clinical relevance at single base resolution. *Nat Neurosci*. 2015;18(1):154-161.
- [37] English JA, Pennington K, Dunn MJ, Cotter DR. The neuroproteomics of schizophrenia. *Biol Psychiatry*. 2011;69(2):163-172.
